# Supplementary material for: Effect of length and functionality of the linker between the main chain and the chiral pendant on the helical nature of chiral poly(ionic liquids)
Source: Royal Society of Chemistry journal article supplement (doi:10.1039/d4py00717d), 2024-01-01
Supplement: d4py00717d1.pdf [file d4py00717d1.pdf]

## **Supporting Information**

### **Effect of Length and Functionality of the Linker ‘between the Main Chain and the Chiral Pendant’ on the Helical Nature of Chiral Poly(Ionic Liquids)**

Baisakhi Tilottama, Kari Vijayakrishna \*

School of Basic Sciences,  
Indian Institute of Technology,  
Bhubaneswar-752050, Odisha, India.  
E-mail: [kvijayakrishna@iitbbs.ac.in](mailto:kvijayakrishna@iitbbs.ac.in) & [vijayakrishnakari@gmail.com](mailto:vijayakrishnakari@gmail.com)

## 1. Supplementary figures

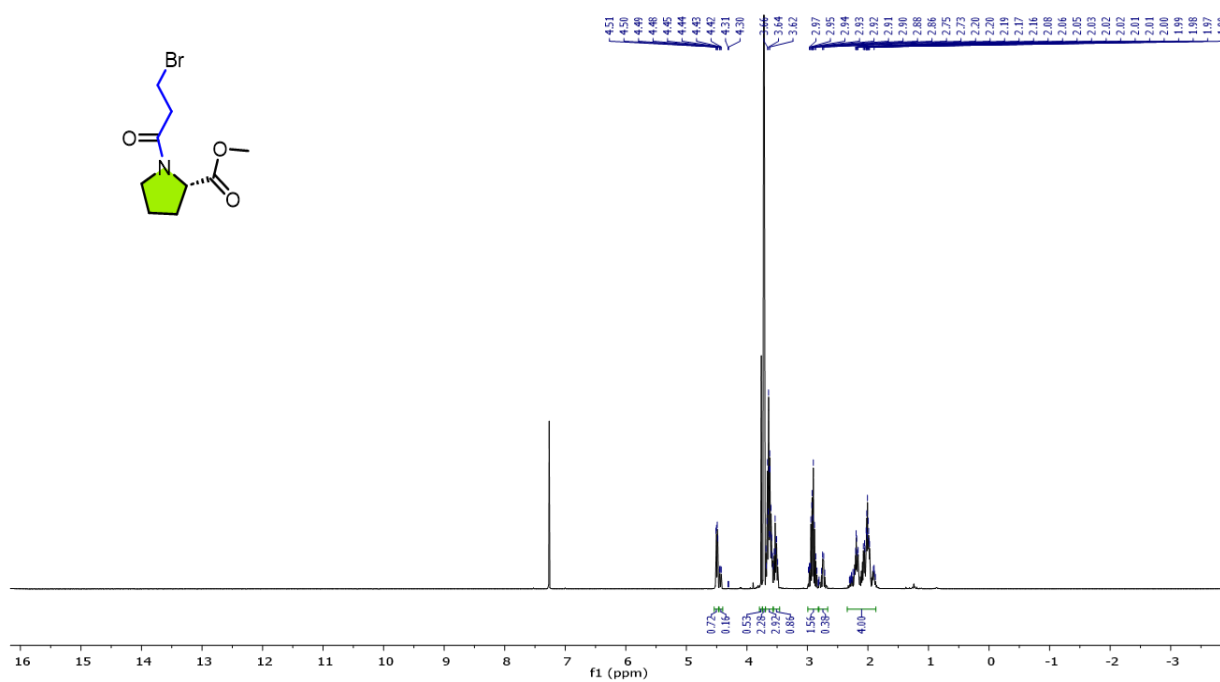

Fig. S1 <sup>1</sup>H NMR spectrum of (L)-3.

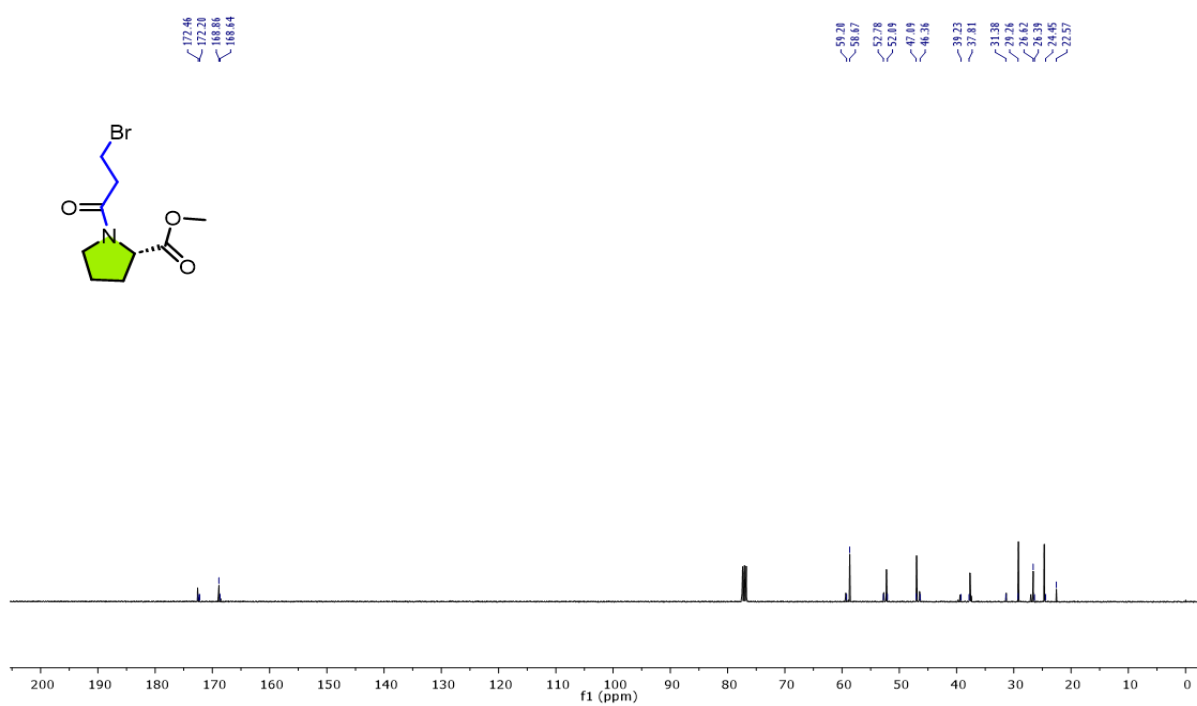

Fig. S2 <sup>13</sup>C NMR spectrum of (L)-3.

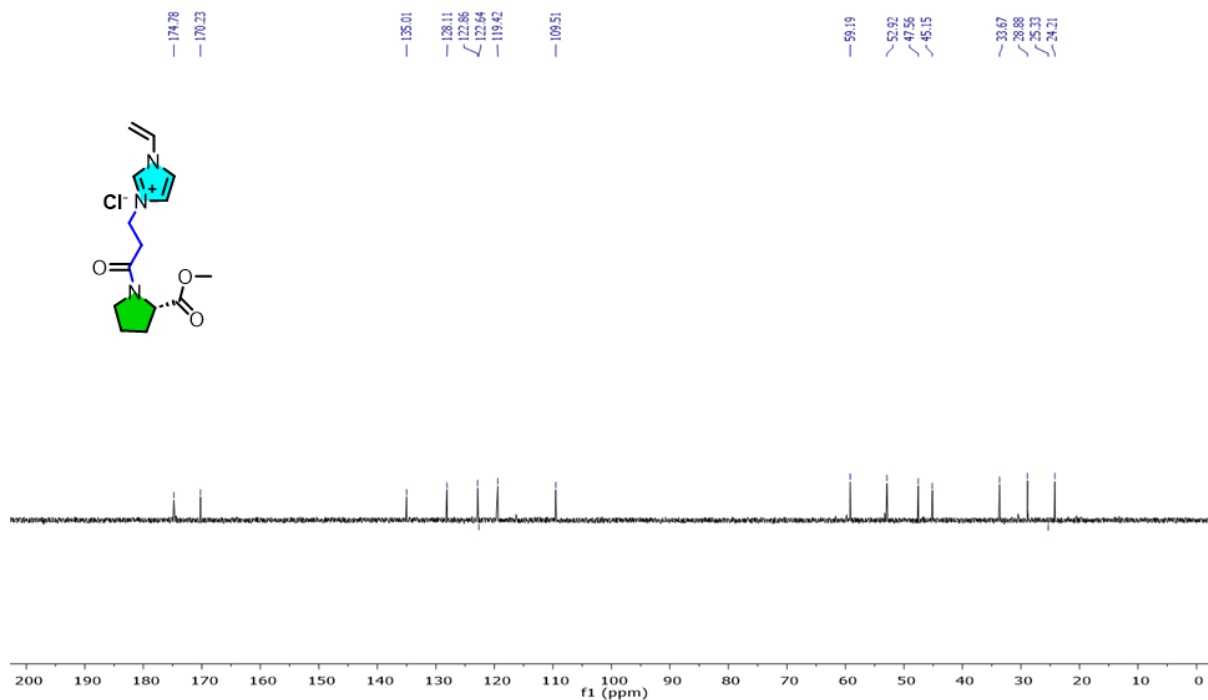

**Fig. S3**  $^{13}\text{C}$  NMR spectrum of mono-(L)-3-Cl.

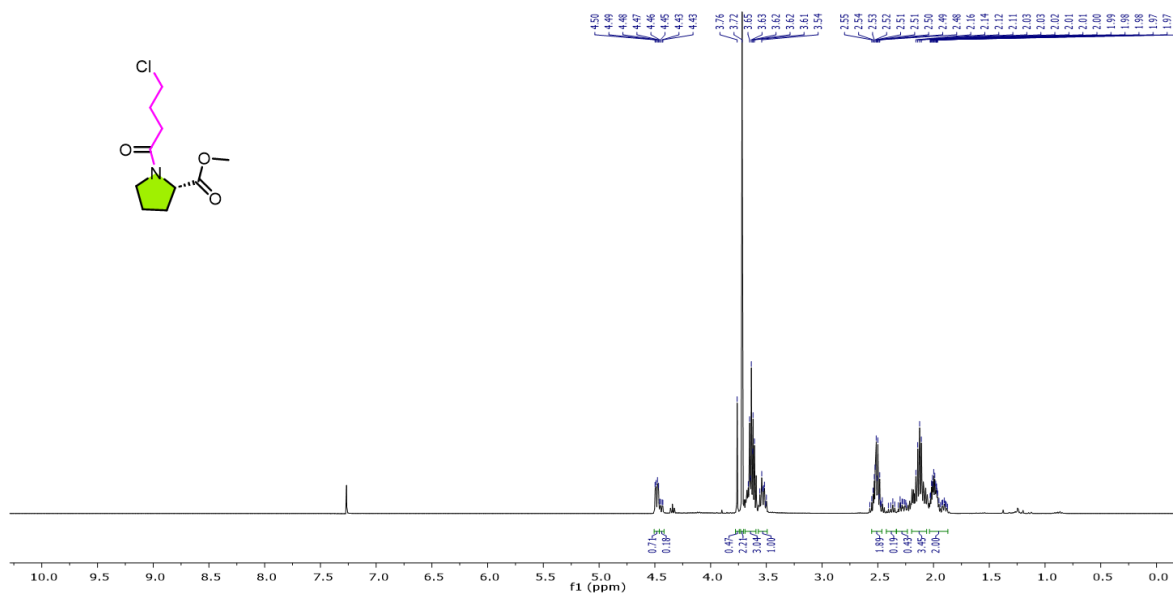

**Fig. S4**  $^1\text{H}$  NMR spectrum of (L)-4.

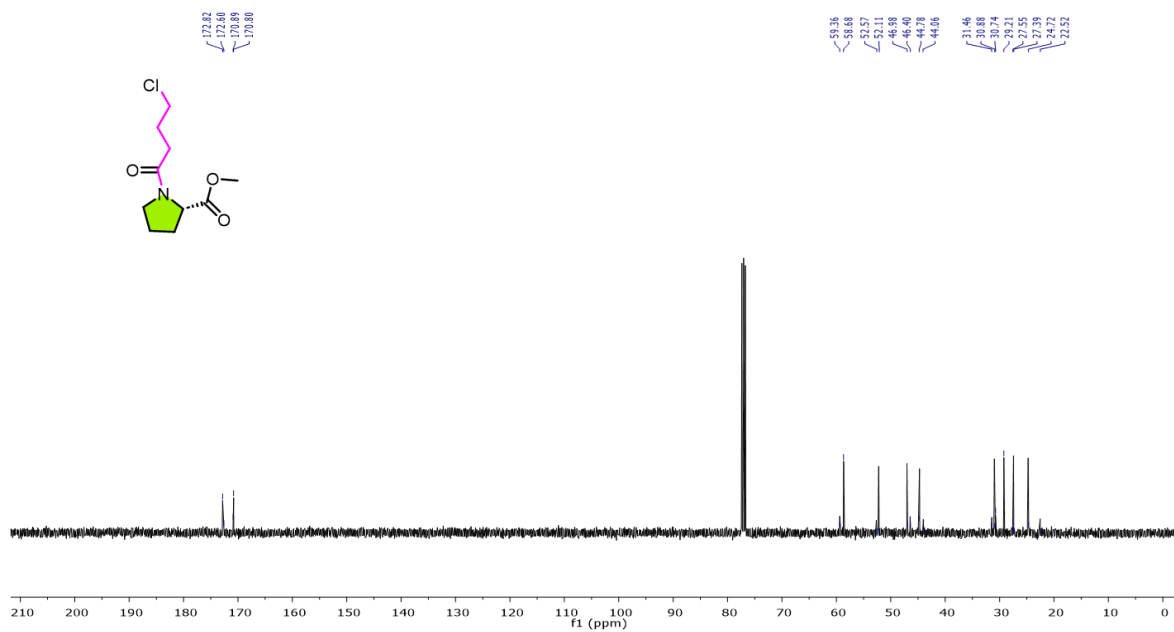

Fig. S5  $^{13}\text{C}$  NMR spectrum of (L)-4.

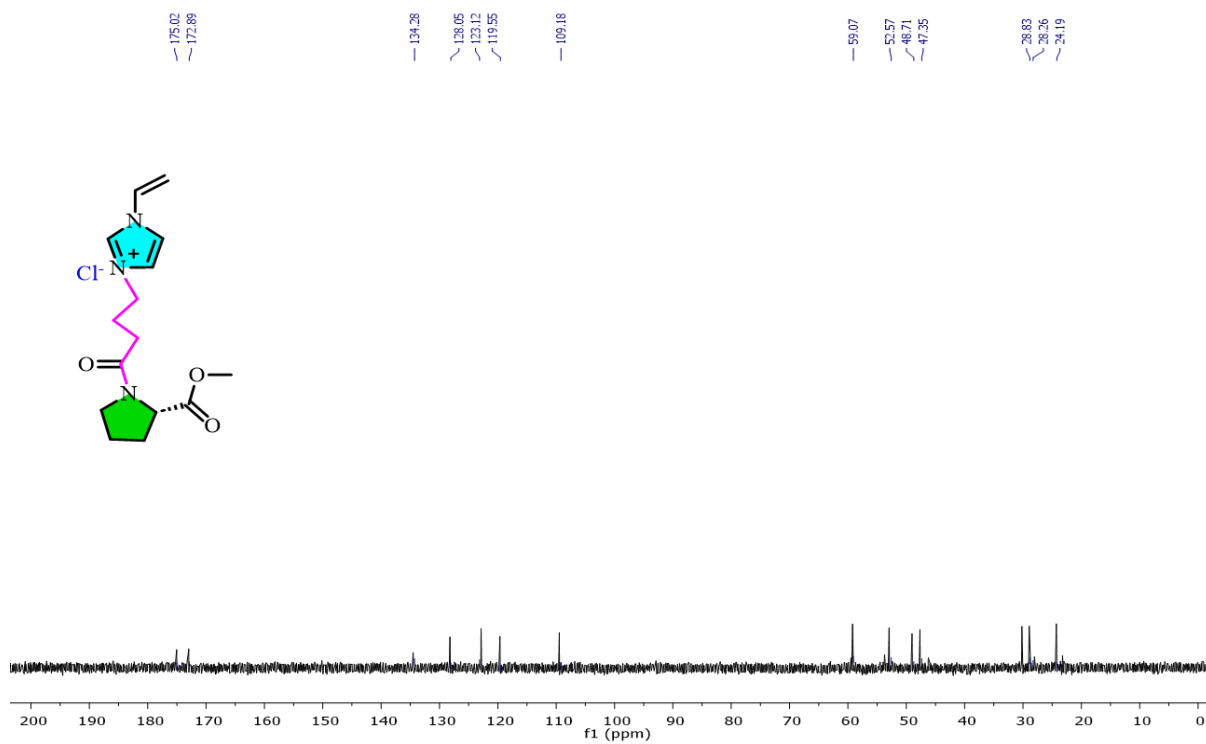

Fig. S6  $^{13}\text{C}$  NMR spectrum of mono-(L)-4-Cl.

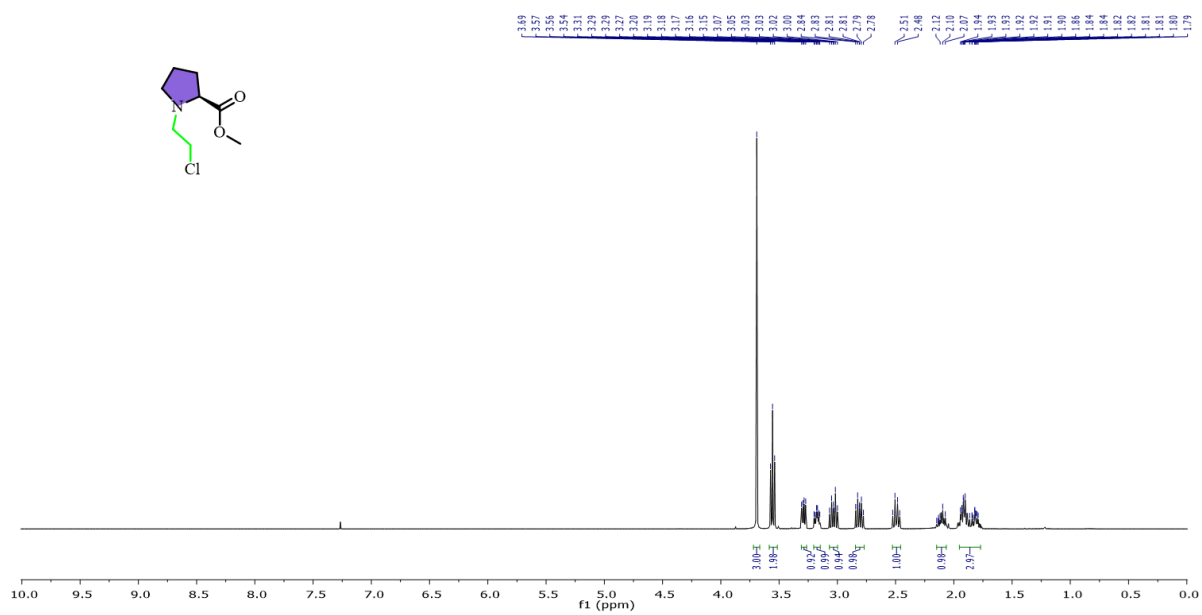

**Fig. S7**  $^1\text{H}$  NMR spectrum of (L)-5.

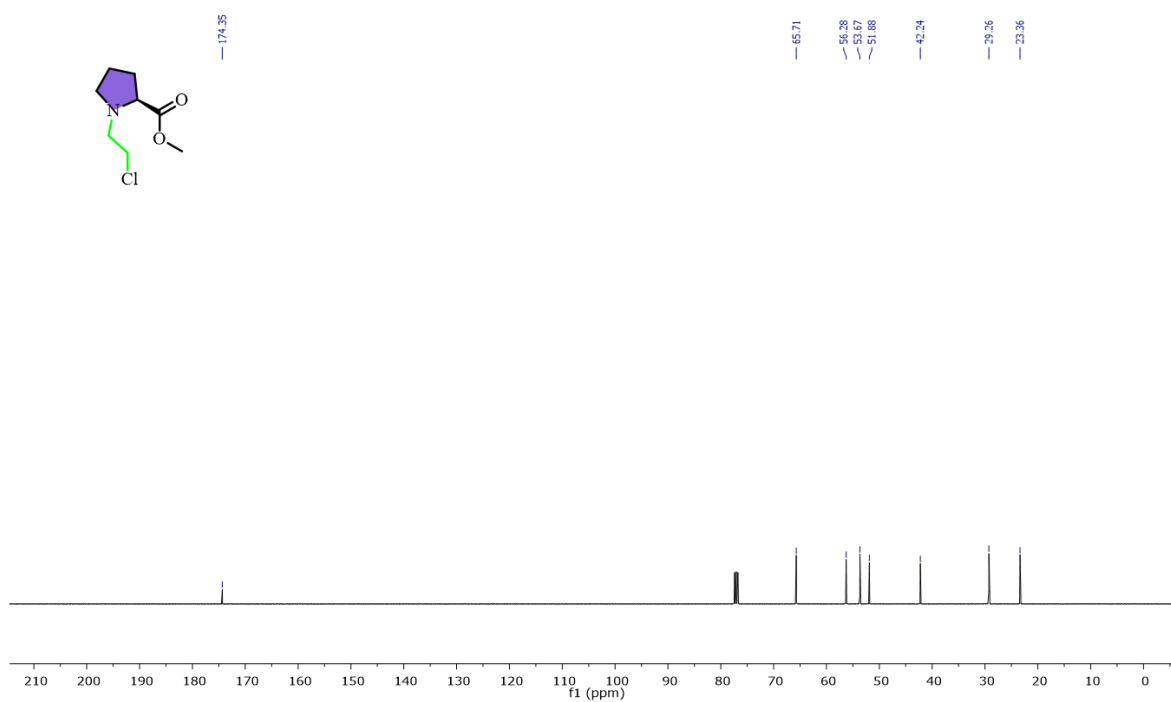

**Fig. S8**  $^{13}\text{C}$  NMR spectrum of (L)-5.

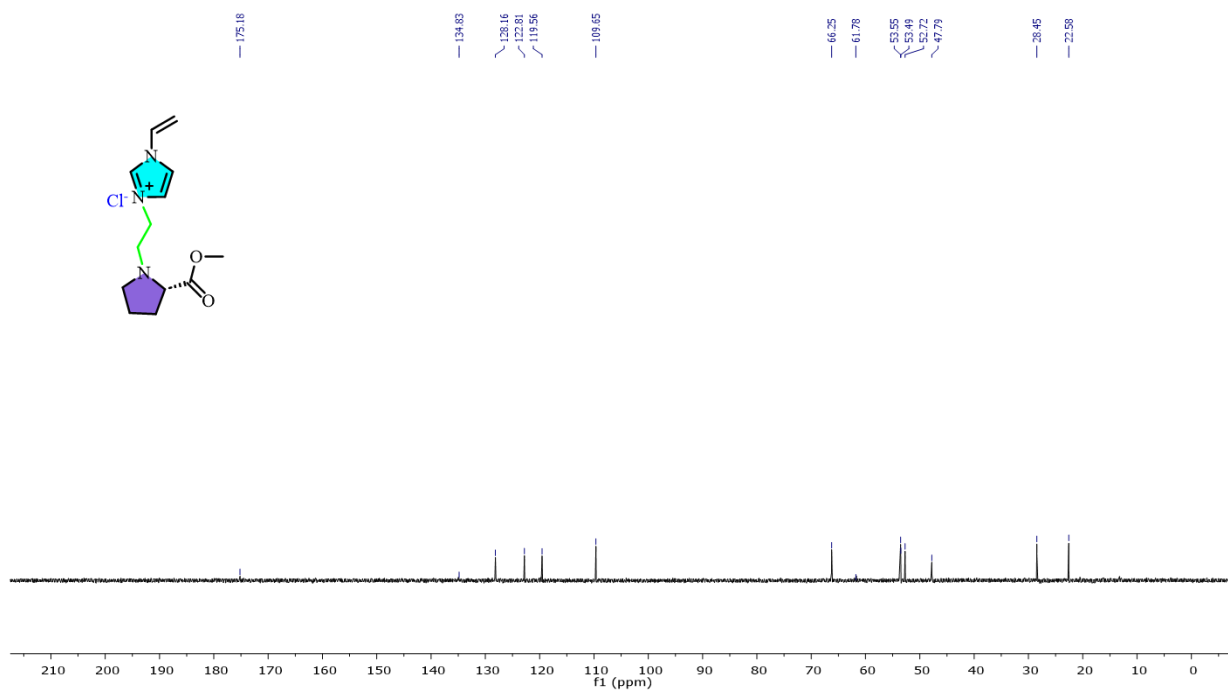

Fig. S9  $^{13}\text{C}$  NMR spectrum of mono-(L)-5-Cl.

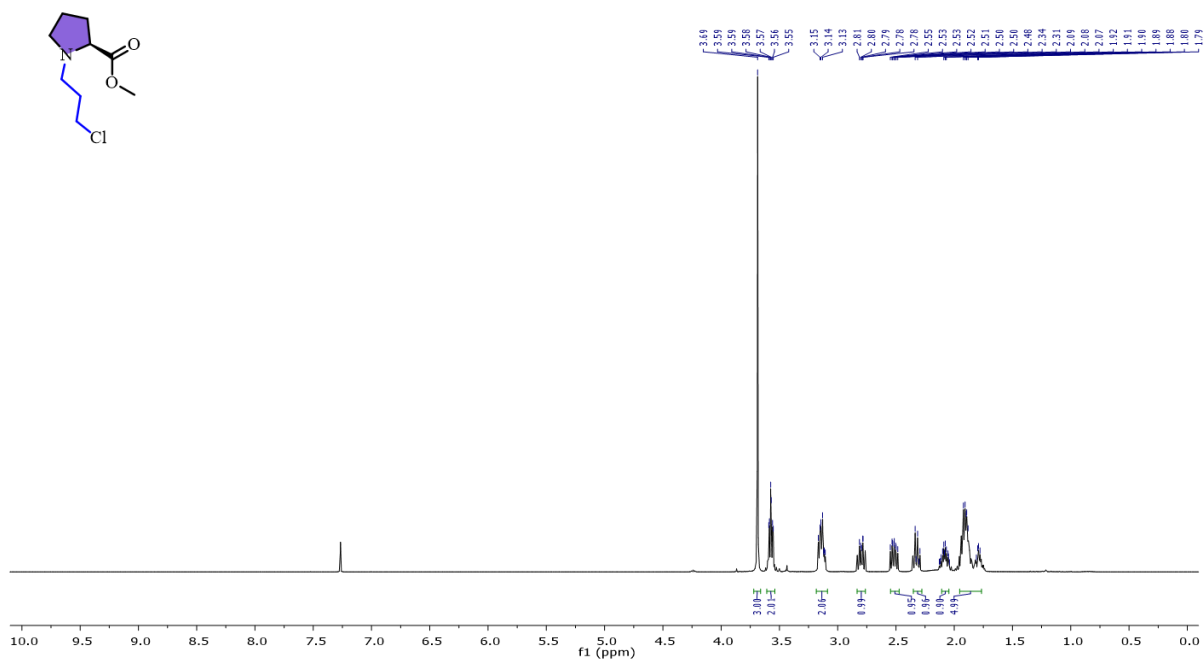

Fig. S10  $^1\text{H}$  NMR spectrum of (L)-5.

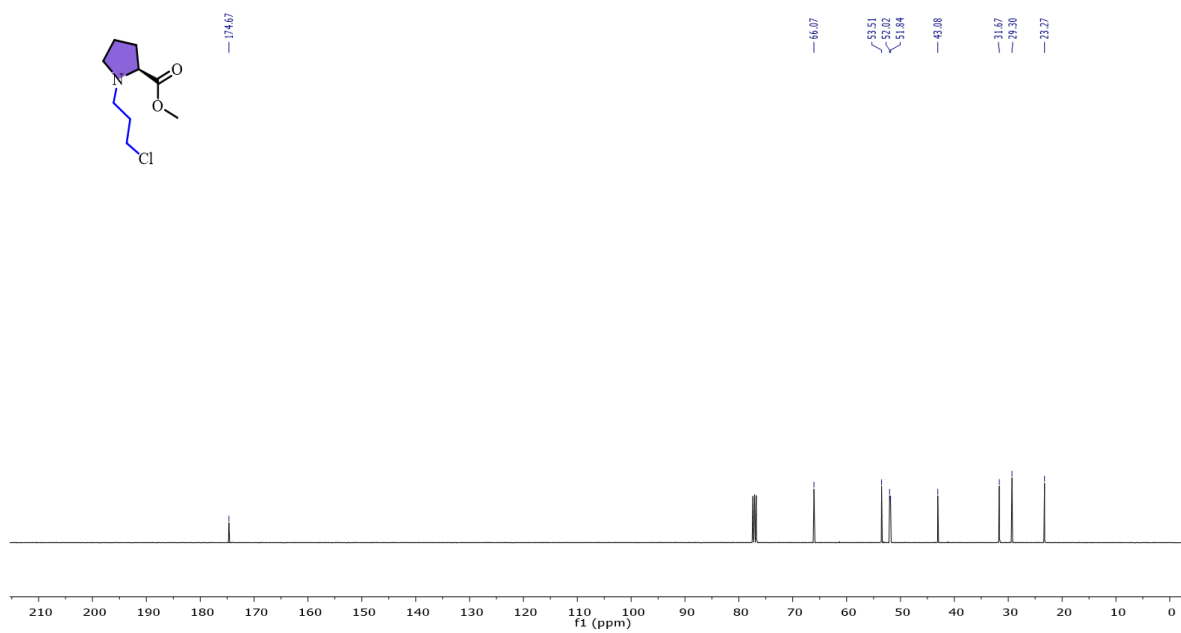

Fig. S11  $^{13}\text{C}$  NMR spectrum of (L)-5.

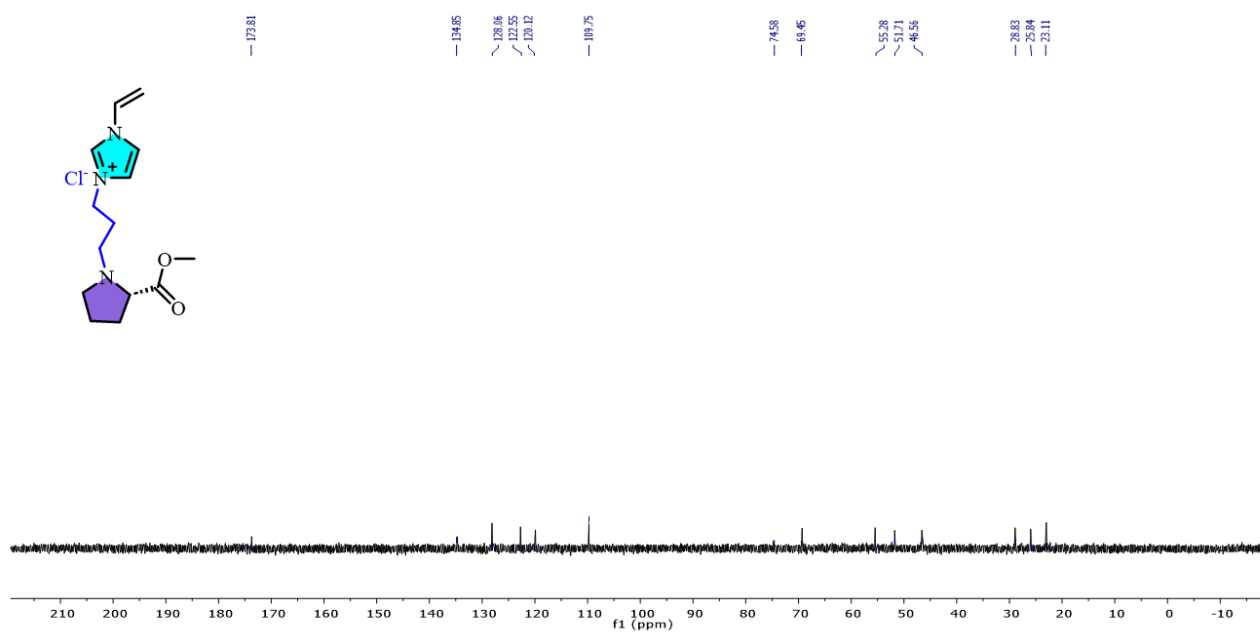

Fig. S12  $^{13}\text{C}$  NMR spectrum of mono-(L)-6-Cl.

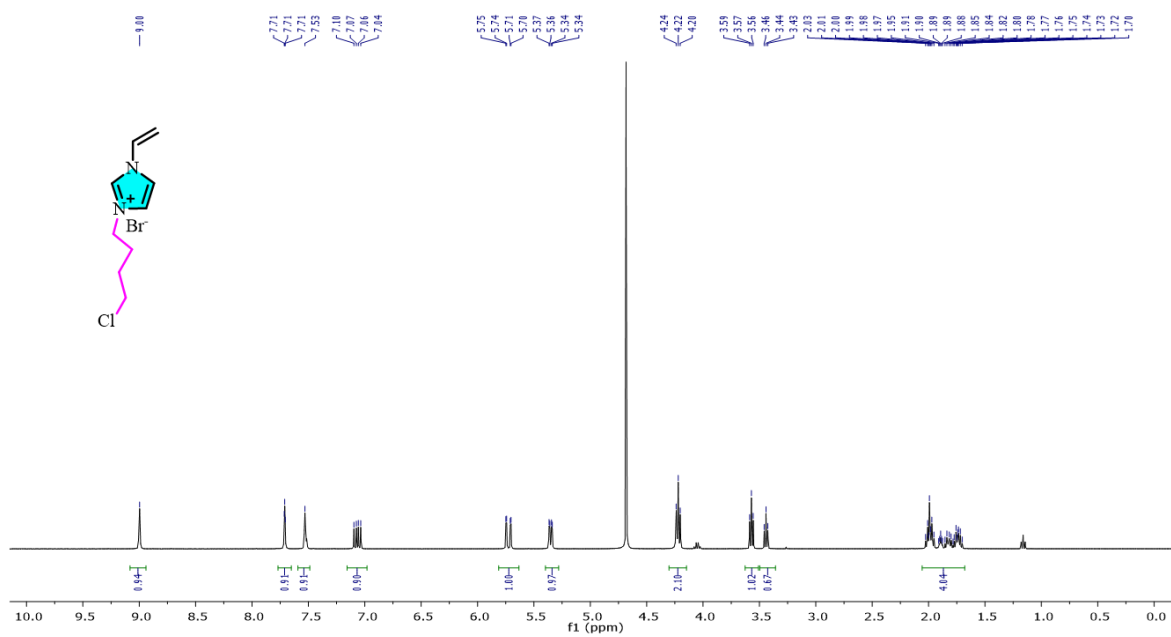

Fig. S13  $^1\text{H}$  NMR spectrum of (L)-7.

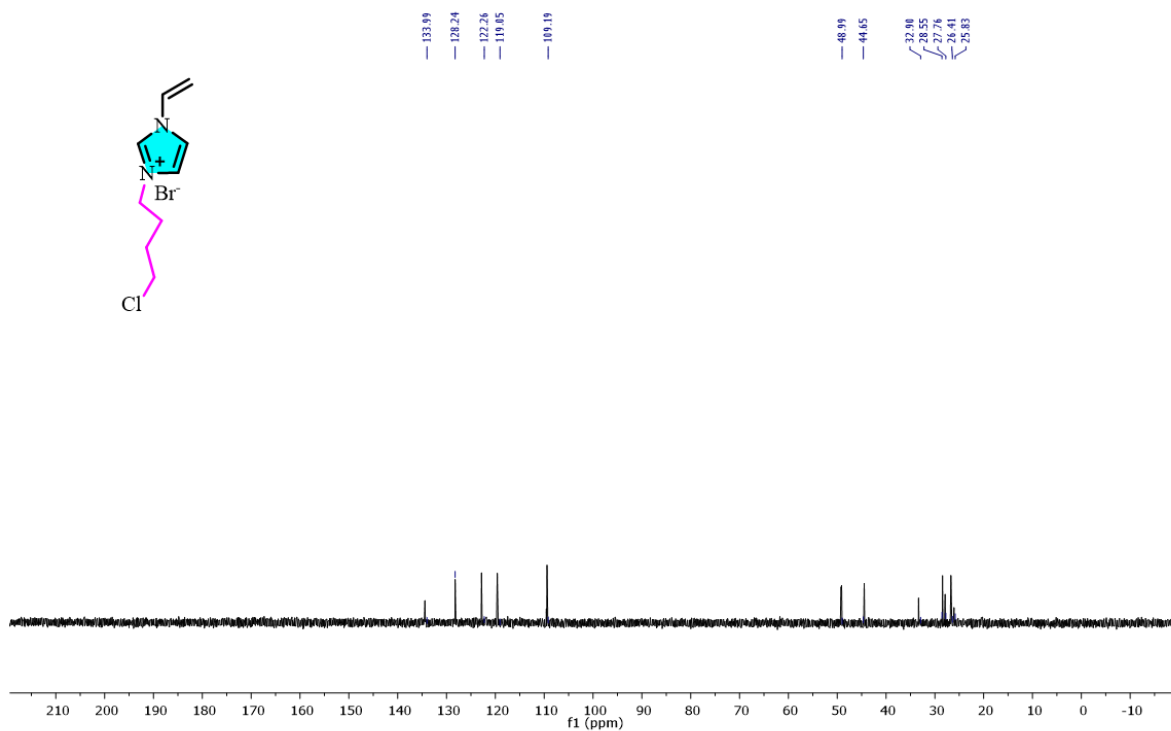

Fig. S14  $^{13}\text{C}$  NMR spectrum of (L)-7.



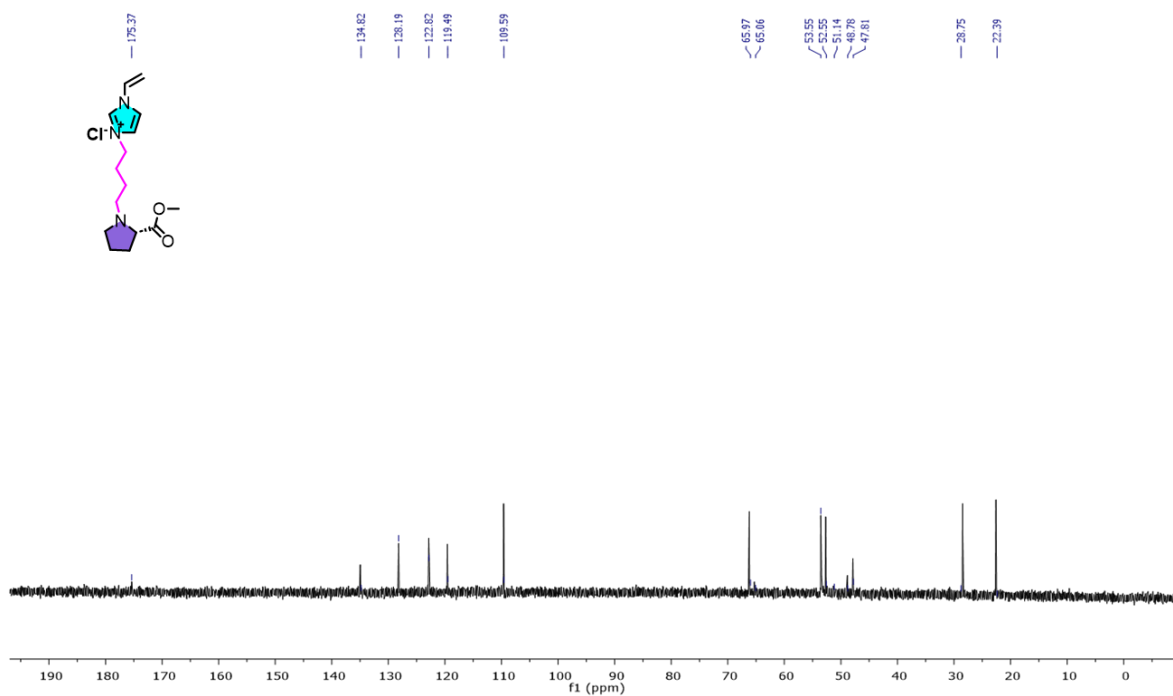

**Fig. S15**  $^{13}\text{C}$  NMR spectrum of **mono-(L)-7-Cl**.

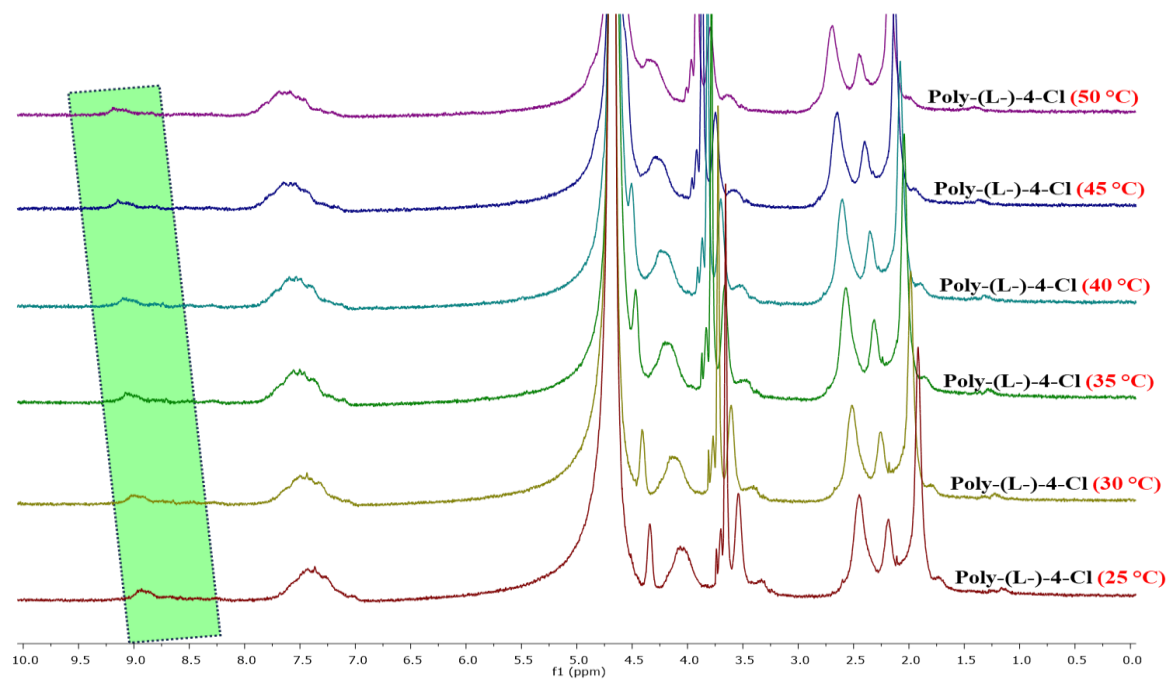

**Fig. S16**  $^1\text{H}$  (in  $\text{D}_2\text{O}$ ) NMR of **poly-(L)-4-Cl** at different temperatures.

A)

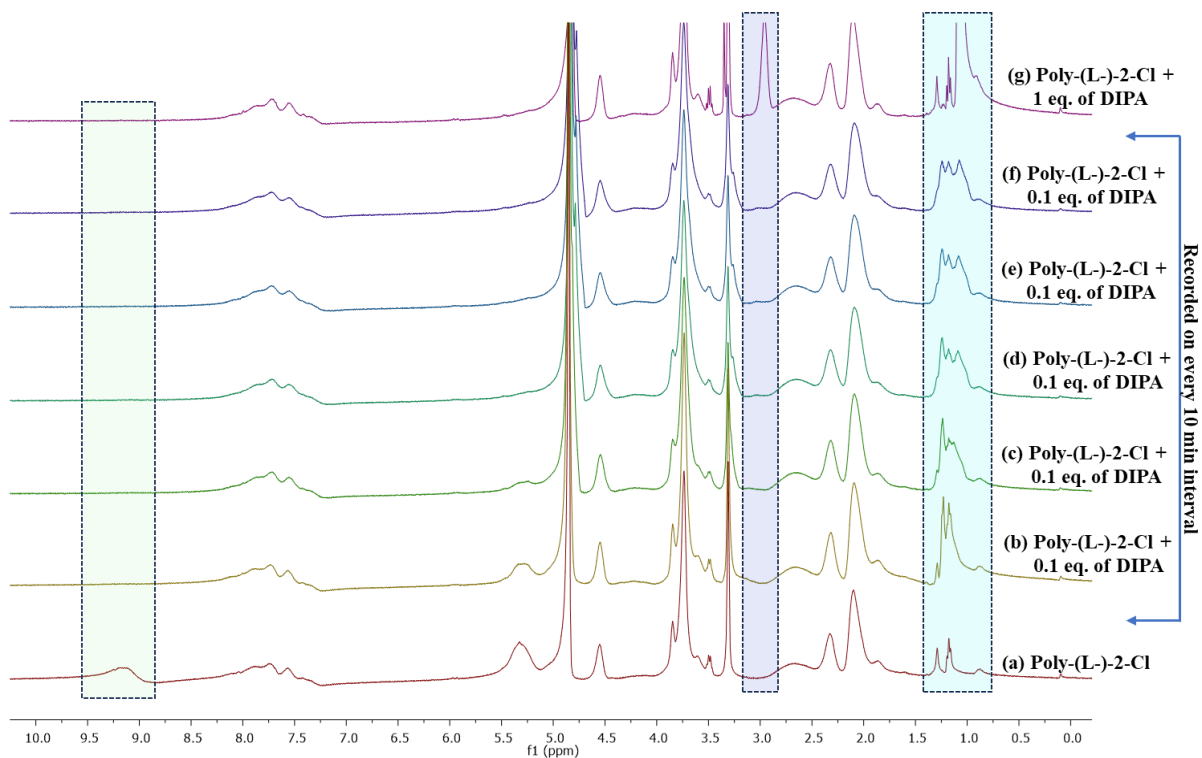

B)

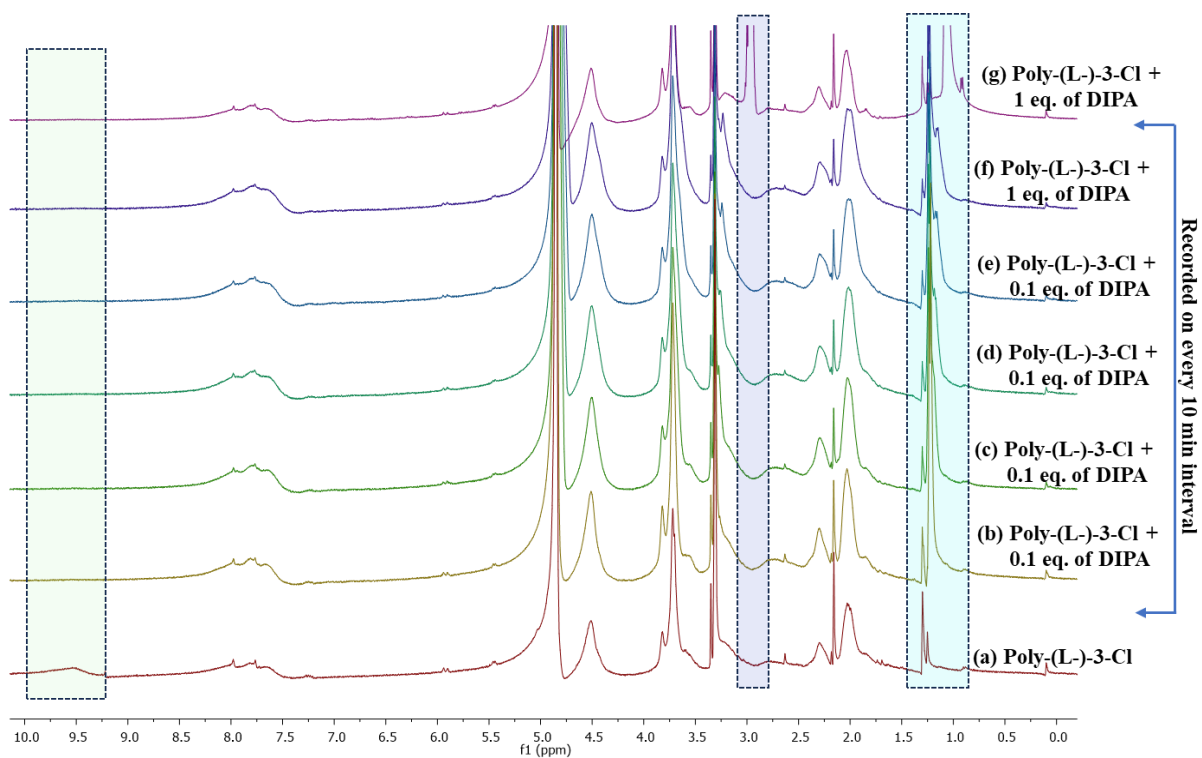

C)

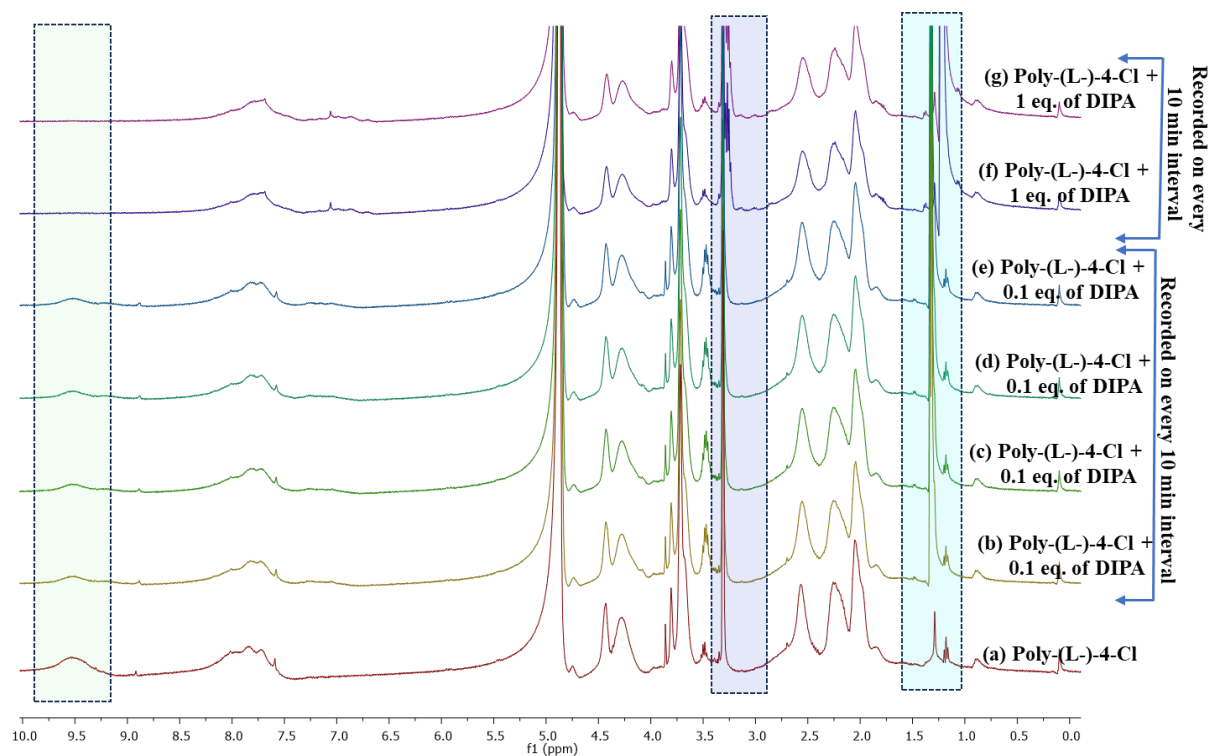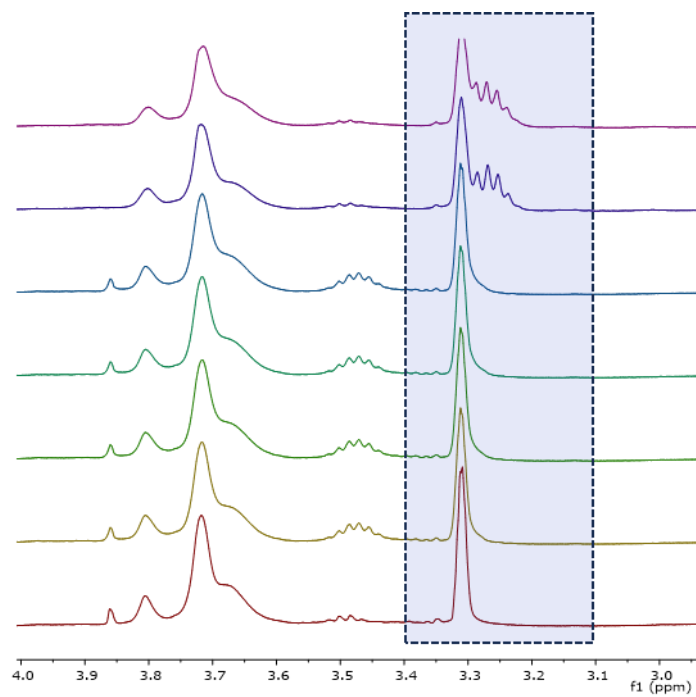

(Expanded region i.e. 3 – 4 ppm for **poly-(L)-4-Cl**)

**Fig. S17** <sup>1</sup>H (in MeOD) NMR of A) **poly-(L)-2-Cl** B) **poly-(L)-3-Cl** and C) **poly-(L)-4-Cl** in presence of 0.1 and 1 equivalent of diisopropylamine at different time interval.

**FT-IR spectroscopy of chiral monomers and their corresponding chiral polymers in presence of diisopropylamine:** \* appearing due to some instrumental error.

A)

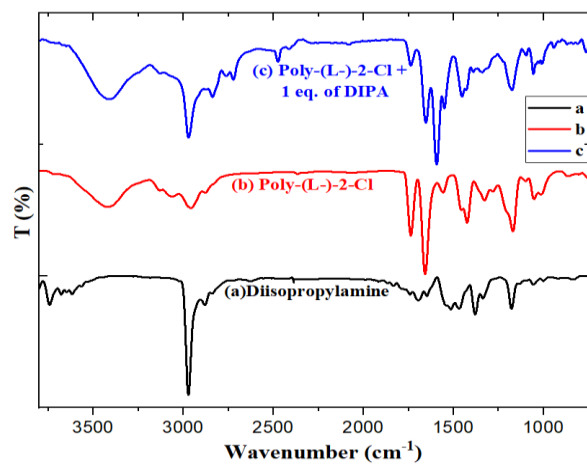

B)

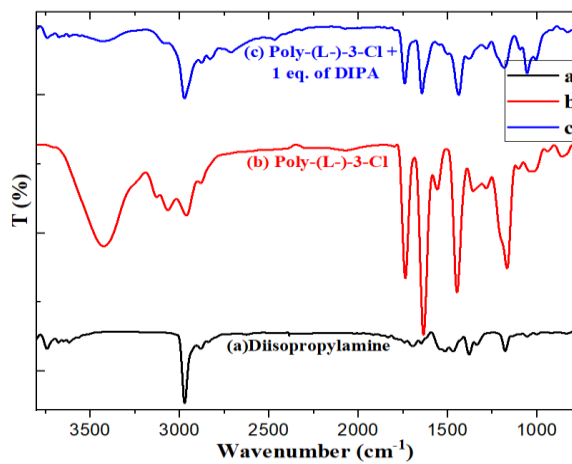

C)

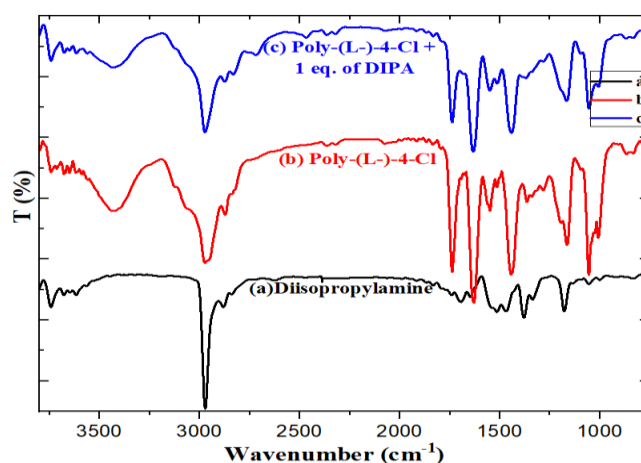

**Fig. S18** FT-IR overlay of A) **poly-(L)-2-Cl**, B) **poly-(L)-3-Cl** and C) **poly-(L)-4-Cl** in presence of diisopropylamine.

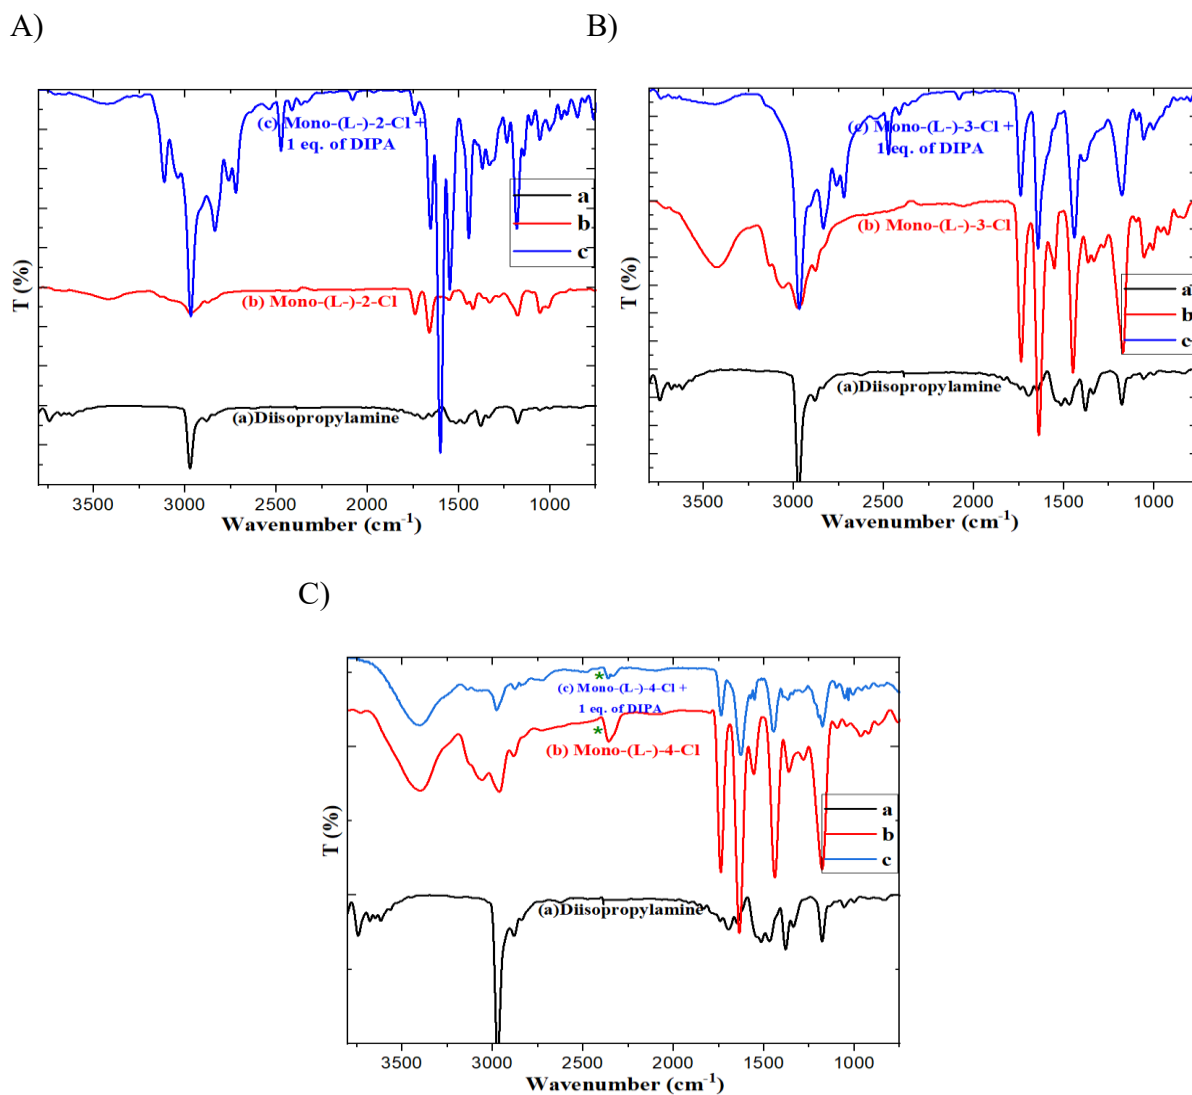

**Fig. S19** FT-IR overlay of A) **mono-(L)-2-Cl**, B) **mono-(L)-3-Cl** and C) **mono-(L)-4-Cl** in presence of diisopropylamine.

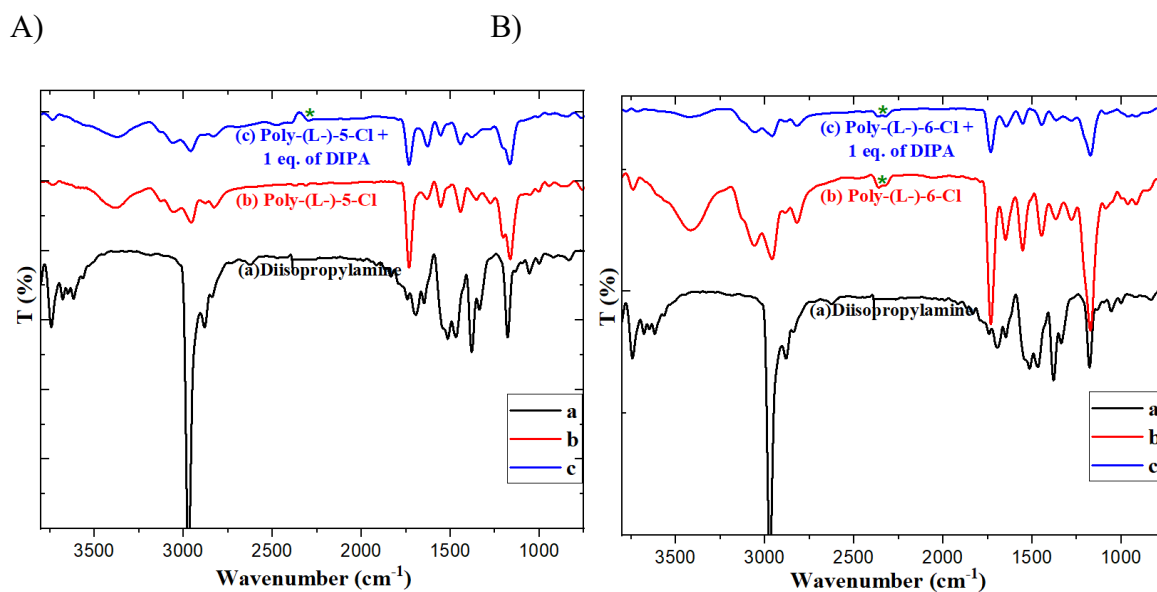

C)

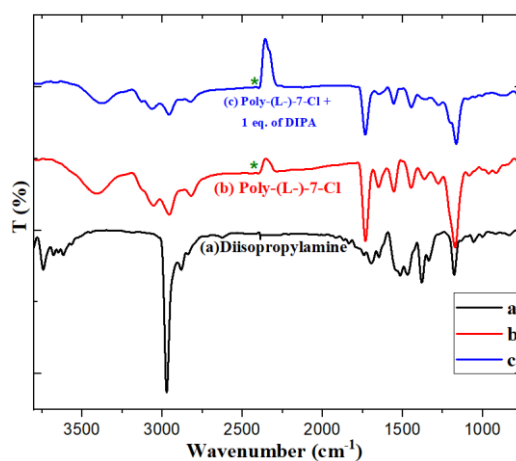

**Fig. S20** FT-IR overlay of A) **poly-(L-)-5-Cl**, B) **poly-(L-)-6-Cl** and C) **poly-(L-)-7-Cl** in presence of diisopropylamine.

A)

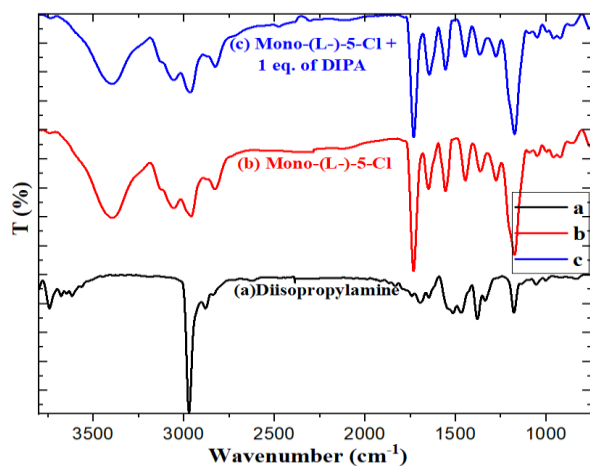

B)

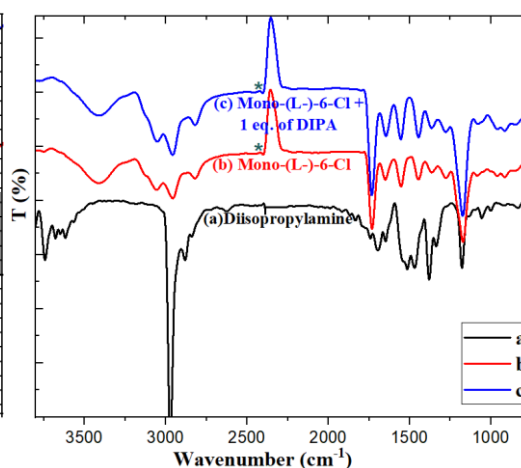

C)

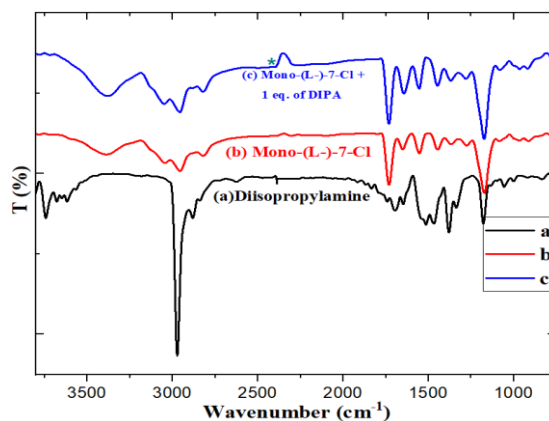

**Fig. S21** FT-IR overlay of A) **mono-(L-)-5-Cl**, B) **mono-(L-)-6-Cl** and C) **poly-(L-)-7-Cl** in presence of diisopropylamine.

### CD absorption spectra of chiral monomes:

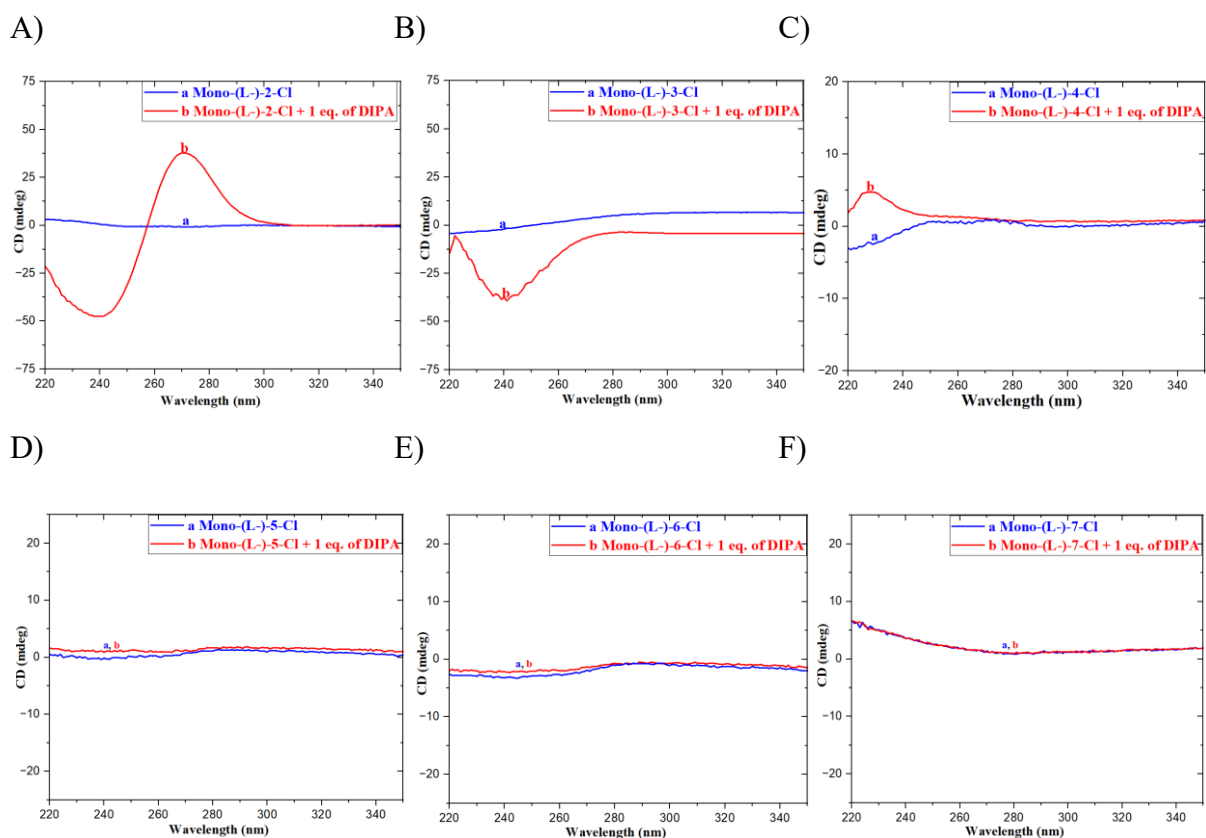

**Fig. S22** CD absorption spectra of chiral monomers before and after addition of diisopropylamine.

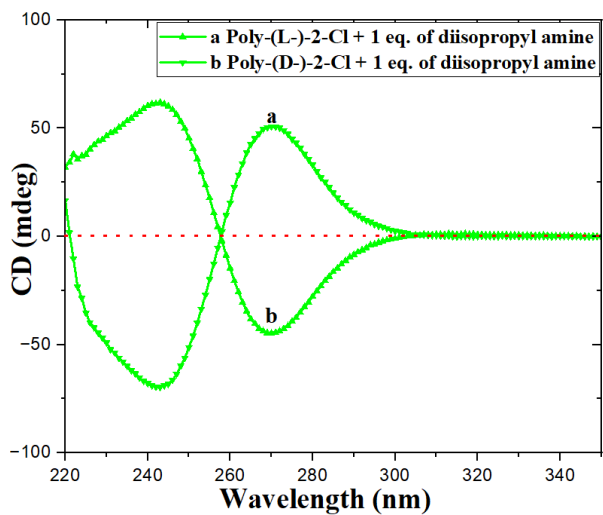

**Fig. S23** CD absorption spectra of **poly-(L)-2-Cl** and **poly-(D)-2-Cl** in presence of diisopropylamine (solvent = methanol, Temp = 25 °C).
